# Supplementary material for: Shh from mossy cells contributes to preventing NSC pool depletion after seizure-induced neurogenesis and in aging
Source: eLife. 2023 Dec 11;12:RP91263. doi: 10.7554/eLife.91263 (PMC10712957; doi:10.7554/eLife.91263)
Supplement: Figure 1—figure supplement 1—source data 1. [file elife-91263-fig1-figsupp1-data1.xlsx]

## Sheet: Figure 1-figure supplement 1
Figure 1-figure supplement 1
	% of Sox2+ S100B- NSCs/ tdTomato+ cells in SGZ	% of Sox2+ GFAP radial NSCs / tdTomato Sox2+ cells in SGZ
	90.7489	45.7338
	88.7892	42.9119
	88.4328	36.0656
