# Supplementary material for: Shh from mossy cells contributes to preventing NSC pool depletion after seizure-induced neurogenesis and in aging
Source: eLife. 2023 Dec 11;12:RP91263. doi: 10.7554/eLife.91263 (PMC10712957; doi:10.7554/eLife.91263)
Supplement: Figure 1—source data 1. [file elife-91263-fig1-data1.xlsx]

## Sheet: Figure 1B
Figure 1B	LacZ+ cells in SGZ (x103)
						ANOVA summary
	Control	1 day	3 day	7 day		F	7.553
	11.61	10.35	16.02	9.72		P value	0.0063
	10.11	8.04	16.74	10.38		P value summary	**
	9.45	11.1	14.55	16.74		Significant diff. among means (P < 0.05)?	Yes
	9.06		17.34
						Tukey's multiple comparisons test	Summary	Adjusted P Value
						Control vs. 1 day	ns	0.9989
						Control vs. 3 day	**	0.0089
						Control vs. 7 day	ns	0.5273
						1 day vs. 3 day	*	0.0115
						1 day vs. 7 day	ns	0.5033
						3 day vs. 7 day	ns	0.1309

## Sheet: Figure 1D
Figure 1D	LacZ+ cells in SGZ (x103)
		Gli1nLacZ/+					Shh+/-;Gli1nLacZ/+						Two-way ANOVA	Ordinary
	Naive	9.45	9.06	15.09	12.21		1.17	2.28	1.41				Alpha	0.05
	KA	16.02	16.74	14.55	17.34		0.69	1.65	1.8	1.68	0.93
													Source of Variation	P value	P value summary	Significant?
													Interaction	0.0088	**	Yes
													Row Factor	0.0166	*	Yes
													Column Factor	<0.0001	****	Yes
													Tukey's multiple comparisons test	Summary	Adjusted P Value
													Naive:Gli1nLacZ/+ vs. Naive:Shh+/-;Gli1nLacZ/+	****	<0.0001
													Naive:Gli1nLacZ/+ vs. KA:Gli1nLacZ/+	**	0.0054
													Naive:Gli1nLacZ/+ vs. KA:Shh+/-;Gli1nLacZ/+	****	<0.0001
													Naive:Shh+/-;Gli1nLacZ/+ vs. KA:Gli1nLacZ/+	****	<0.0001
													Naive:Shh+/-;Gli1nLacZ/+ vs. KA:Shh+/-;Gli1nLacZ/+	ns	0.9951
													KA:Gli1nLacZ/+ vs. KA:Shh+/-;Gli1nLacZ/+	****	<0.0001

## Sheet: Figure 1H
Figure 1H	BrdU+ DCX+ cells in SGZ (x103)
		WT						Shh+/-							Two-way ANOVA	Ordinary
	Naive	5.91	6.69	6.51	5.7			4.8	4.35	6.09	5.13				Alpha	0.05
	KA	17.94	15.93	21.54	21.81	25.23	22.83	15.33	11.88	3.96	7.59	9.3	2.49
															Source of Variation	P value	P value summary	Significant?
															Interaction	0.0017	**	Yes
															Row Factor	<0.0001	****	Yes
															Column Factor	0.0004	***	Yes
															Tukey's multiple comparisons test	Summary	Adjusted P Value
															Naive:WT vs. Naive:Shh+/-	ns	0.9638
															Naive:WT vs. KA:WT	****	<0.0001
															Naive:WT vs. KA:Shh+/-	ns	0.7297
															Naive:Shh+/- vs. KA:WT	****	<0.0001
															Naive:Shh+/- vs. KA:Shh+/-	ns	0.4286
															KA:WT vs. KA:Shh+/-	****	<0.0001

## Sheet: Figure 1I
Figure 1I	BrdU+ DCX+ cells in Hilus (x103)
		WT						Shh+/-							Two-way ANOVA	Ordinary
	Naive	0.06	0.18	0.12	0.06			0.09	0.06	0.03	0.03				Alpha	0.05
	KA	0.69	0.51	1.29	1.44	0.81	0.99	0.75	0.57	0.12	0.33	0.3	0.21
															Source of Variation	P value	P value summary	Significant?
															Interaction	0.0303	*	Yes
															Row Factor	<0.0001	****	Yes
															Column Factor	0.0115	*	Yes
															Tukey's multiple comparisons test	Summary	Adjusted P Value
															Naive:WT vs. Naive:Shh+/-	ns	0.9895
															Naive:WT vs. KA:WT	***	0.0003
															Naive:WT vs. KA:Shh+/-	ns	0.3234
															Naive:Shh+/- vs. KA:WT	***	0.0001
															Naive:Shh+/- vs. KA:Shh+/-	ns	0.1933
															KA:WT vs. KA:Shh+/-	**	0.0039
