# Supplementary material for: Shh from mossy cells contributes to preventing NSC pool depletion after seizure-induced neurogenesis and in aging
Source: eLife. 2023 Dec 11;12:RP91263. doi: 10.7554/eLife.91263 (PMC10712957; doi:10.7554/eLife.91263)
Supplement: Figure 2—source data 1. [file elife-91263-fig2-data1.xlsx]

## Sheet: Figure 2B
Figure 2B	tdTomato+ cells in DG (x103)
		Naive			KA
	Hilus	10.05	9.96	12.51	9.36	11.31	11.31
	GCL	0.12	0.15	1.56	0	0.03	0.12
	ML	0.45	1.08	0.39	0.45	1.08	0.39

## Sheet: Figure 2D
Figure 2D	% of marker+ cells in Hilus
		Naive			KA
	GluR2/3	88.3582	90.3614	90.8873	90.0641	90.9814	91.5119
	Parvalbumin	2.01149	3.34262	3.06122	2.30263	2.94118	3.46667
	Other	9.6303	6.29594	6.05149	7.63327	6.07739	5.0214
	Average	Naive	KA
	GluR2/3	89.869	90.8525
	Parvalbumin	2.80511	2.90216
	Other	7.32591	6.24402

## Sheet: Figure 2G
Figure 2G	# of Shh mRNA puncta/ GluR2/3+ cells
	Naive	KA		Unpaired t test
	16	10		P value	<0.0001
	2	9		P value summary	****
	4	10
	7	17
	11	7
	0	11
	0	7
	0	23
	4	11
	7	9
	12	6
	11	14
	4	18
	9	10
	12	10
	1	17
	3	10
	1	12
	3	3
	0	19
	3	15
	2	4
	8	4
	5	9
	3	22
	4	11
	8	15
	10	13
	10	13
	3	7
	29	11
	3	6
	0	19
	1	12
	7	18
	4	5
	3	2
	7	9
	4	8
	6	9
	9	6
	5	10
	3	3
	1	21
	4	6
	10	15
	7	16
	1	14
	10	13
	5	17
	0	8
	4	12
	3	16
	0	9
	1	16
	3	17
	1	9
	4	9
	5	8
	7	12
	5	5
	9	17
	4	16
	3	12
	3	18
	10	6
	8	8
	7	17
	6	31
	14	20
	1	19
	7	11
	12	11
	3	18
	9	13
	4	6
	1	25
	3	12
	7	22
	6	12
	2	2
	3	4
	9	9
	15	11
	7	7
	6	13
	6	17
	2	4
	2	3
	13	6
	2	15
	10	9
	6	7
	10	12
	5	9
	0	6
	0	21
	9	17
	9	9
	7	14
	5	14
	7	15
	13	9
	0	14
	5	6
	4	7
	4	11
	7	18
	8	9
	0	17
	1	13
	7	10
	0	7
	3	5
	6	13
	6	11
	1	12
	5	26
	10	13
	2	5
	9	8
	3	3
	2	17
	7	10
	5	30
	1	14
	6	11
	1	12
	4	12
	9	24
	7	20
	6	6
	4	14
	7	12
	4	6
	4	12
	5	7
	3	6
	4	2
	10	16
	3	15
	6	11
	0	7
	3	16
	2	21
	10	21
	6	19
	3	19
	3	10
	7	10
	6	13
	7	22
	3	13
	1	8
	11	34
	8	12
	4	13
	6	15
	6	11
	4	15
	2	8
	0	8
	9	13
	5	8
	4	11
	9	11
	2	9
	5	20
	4	8
	2	1
	8	6
	6	22
	9	3
	15	15
	9	14
	8	8
	6	27
	7	26
	6	24
	10	3
	2	16
	3	24
	5	30
	0	19
	4	17
	13	17
	5	9
	6	13
	5	5
	5	11
	5	14
	7	24
	10	27
	4	12
	6	5
	7	13
	3	5
	8	15
	12	20
	5	6
	3	8
	7	9
	7	7
	6	13
	6	6
	4	7
	9	9
	12	2
	7	12
	5	42
	6	10
	4	19
	7	12
	8	33
	8	17
	6	21
	4	22
	8	13
	3	2
	7	4
	7	22
	13	7
	5	23
	5	20
	2	10
	6	15
	5	14
	9	12
	14	24
	3	8
	7	14
	8	8
	3	10
	6	5
	2	30
	8	13
	7	4
	7	3
	2	27
	8	17
	5	7
	6	26
	6	19
	8	11
	8	32
	8	13
	4	22
	2	16
	5	10
	9	30
	3	25
	11	22
	5	9
	4	7
	3	28
	7	24
	8	12
	7	20
	10	15
	6	22
	5	22
	10	13
	9	5
	3	10
	7	14
	8	23
	4	12
	2	19
	8	11
	9	7
	5	7
	8	20
	3	2
	8	11
	8	21
	8	10
	9	27
	5	7
	6	11
	6	5
	12	13
	7	15
	3	3
	8	11
	5	15
	7	4
	5	13
	5	3
	0	13
	2	5
	4	16
	0	14
	3	18
	0	13
	1	9
	5	20
	4	12
	5	13
	1	9
	7	9
	3	6
	2	15
	3	6
	4	7
	4	19
	3	6
	4	10
	4	8
	4	18
	4	19
	5	8
	6	27
	3	13
	14	7
	3	8
	5	4
	4	18
	2	27
	4	6
	8	13
	2	6
	1	28
	3	23
	3	14
	2	15
	3	4
	6	3
	1	19
	10	21
	10	7
	4	10
	10	10
	6	5
	4	18
	8	11
	1	12
	3	10
	5	11
	2	5
	5	19
	5	11
	3	11
	6	11
	7	14
	1	8
	5	15
	1	8
	12	16
	1	11
	7	21
	5	6
	2	9
	5	14
	6	16
	3	11
	5	18
	5	25
	7	22
	3	21
	5	11
	3	22
	6	5
	6	17
	2	15
	2	8
	8	6
	3	34
	1	23
	0	10
	3	30
	1	15
	2	35
	8	22
	5	19
	12	6
	6	9
	4	4
	7	9
	11	16
	4	15
	5	27
	5	17
	7	11
	6	18
	7	10
	4	20
	4	8
	5	13
	4	8
	15	16
	5	28
	16	33
	3	22
	6	8
	3	9
	4	14
	3	17
	2	12
	8	14
	4	16
	5	8
	4	28
	6	26
	9	20
	7	38
	5	21
	6	8
	5	16
	7	15
	3	28
	2	20
	8	14
	3	7
	1	8
	7	14
	2	6
	4	25
	2	24
	2	10
	3	4
	5	27
	1	15
	2	11
	5	11
	6	9
	5	16
	6	8
	3	9
	6	14
	2	13
	10	14
	4	16
	4	17
	2	16
	2	16
	11	11
	3	10
	5	10
	2	2
	2	4
	5	2
	5	13
	8	19
	4	6
	9	4
	5	16
	12	7
	6	10
	11	10
	8	20
	3	16
	7	8
	6	6
	6	12
	5	22
	7	14
	1	4
	5	20
	4	4
	4	9
	8	16
	6	20
	8	13
	9	11
	1	10
	4	13
	6	2
	14	4
	6	5
	20	19
	6	22
	6	18
	8	11
	7	7
	2	13
	6	7
	3	7
	4	8
	4	14
	3	15
	5	13
	4	13
	10	9
	2	4
	2	12
	0	12
	1	5
	2	21
	4	8
	9	9
	3	14
	1	8
	5	13
	5	3
	4	12
	6	16
	5	8
	4	16
	4	22
	7	12
	3	10
	7	6
	3	22
	3	6
	8	16
	6	13
	3	17
	9	6
	5	15
	3	7
	5	9
	7	6
	3	8
	6	10
	3	20
	4	4
	3	12
	0	7
	8	8
	6	11
	1	12
	3	8
	7	14
	5	7
	5	10
	5	9
	9	14
	10	19
	9	9
	4	20
	4	18
	3	10
	2	13
	7	20
	5	5
	10	12
	3	9
	6	17
	9	15
	8	14
	6	21
	6	15
	3	16
	3	17
	11	24
	7	5
	7	18
	5	19
	6	6
	6	17
	0	17
	3	6
	8	27
	6	11
	6	15
	3	19
	5	8
	3	6
	3	20
	6	12
	3	9
	7	26
	7	11
	4	28
	6	23
	4	14
	5	22
	4	22
	6	11
	8	14
	3	13
	8	8
	7	19
	6	39
	5	6
	11	16
	3	9
	9	12
	7	9
	3	34
	1	10
	2	15
	3	16
	12	12
	2
	10
	7
	6
	3
	7
	2
	2
	10
	4
	8
	4
	5
	6
	7
	4
	4
	5
	3
	6
	3
	7
	0
	3
