# Supplementary material for: Shh from mossy cells contributes to preventing NSC pool depletion after seizure-induced neurogenesis and in aging
Source: eLife. 2023 Dec 11;12:RP91263. doi: 10.7554/eLife.91263 (PMC10712957; doi:10.7554/eLife.91263)
Supplement: Figure 3—figure supplement 1—source data 1. [file elife-91263-fig3-figsupp1-data1.xlsx]

## Sheet: Figure 3-figure supplement 1
Figure 3-figure supplement 1			SOX2+ GFAP+ cells in SGZ (x103)
	Control	Shh-cKO		Unpaired t test
	21.63	20.16		P value	0.8609
	20.25	20.64		P value summary	ns
	21.96	22.86		Significantly different (P < 0.05)?	No
	21.75	19.77		One- or two-tailed P value?	Two-tailed
	17.7	20.73
