# Supplementary material for: Shh from mossy cells contributes to preventing NSC pool depletion after seizure-induced neurogenesis and in aging
Source: eLife. 2023 Dec 11;12:RP91263. doi: 10.7554/eLife.91263 (PMC10712957; doi:10.7554/eLife.91263)
Supplement: Figure 3—source data 1. [file elife-91263-fig3-data1.xlsx]

## Sheet: Figure 3B
Figure 3B	LacZ+ cells in SGZ (x103)
		Control;Gli1nLacZ/+						Shh-cKO;Gli1nLacZ/+							Two-way ANOVA	Ordinary
	Naive	12.96	7.44	5.52	10.47	12	5.04	0.12	0.09	0.12					Alpha	0.05
	KA	15.24	17.97	11.76				0	0.03	0	0.21
															Source of Variation	P value	P value summary	Significant?
															Interaction	0.0377	*	Yes
															Row Factor	0.0404	*	Yes
															Column Factor	<0.0001	****	Yes
															Tukey's multiple comparisons test	Summary	Adjusted P Value
															Naive:Control;Gli1nLacZ/+ vs. Naive:Shh-cKO;Gli1nLacZ/+	**	0.0017
															Naive:Control;Gli1nLacZ/+ vs. KA:Control;Gli1nLacZ/+	*	0.0232
															Naive:Control;Gli1nLacZ/+ vs. KA:Shh-cKO;Gli1nLacZ/+	***	0.0008
															Naive:Shh-cKO;Gli1nLacZ/+ vs. KA:Control;Gli1nLacZ/+	****	<0.0001
															Naive:Shh-cKO;Gli1nLacZ/+ vs. KA:Shh-cKO;Gli1nLacZ/+	ns	>0.9999
															KA:Control;Gli1nLacZ/+ vs. KA:Shh-cKO;Gli1nLacZ/+	****	<0.0001

## Sheet: Figure 3E
Figure 3E	BrdU+ DCX+ cells in SGZ (x103)
													Two-way ANOVA	Ordinary
		Control					Shh-cKO						Alpha	0.05
	Naive	4.32	3.81	4.59	6.63	4.53	3.54	4.2	3.84	4.83
	KA	19.71	20.07	20.52	20.13	18.84	9.51	7.08	12.78	11.79	13.98		Source of Variation	P value	P value summary	Significant?
													Interaction	<0.0001	****	Yes
													Row Factor	<0.0001	****	Yes
													Column Factor	<0.0001	****	Yes
													Tukey's multiple comparisons test	Summary	Adjusted P Value
													Naive:Control vs. Naive:Shh-cKO	ns	0.919
													Naive:Control vs. KA:Control	****	<0.0001
													Naive:Control vs. KA:Shh-cKO	****	<0.0001
													Naive:Shh-cKO vs. KA:Control	****	<0.0001
													Naive:Shh-cKO vs. KA:Shh-cKO	****	<0.0001
													KA:Control vs. KA:Shh-cKO	****	<0.0001
