# Supplementary material for: Shh from mossy cells contributes to preventing NSC pool depletion after seizure-induced neurogenesis and in aging
Source: eLife. 2023 Dec 11;12:RP91263. doi: 10.7554/eLife.91263 (PMC10712957; doi:10.7554/eLife.91263)
Supplement: Figure 4—figure supplement 2—source data 1. [file elife-91263-fig4-figsupp2-data1.xlsx]

## Sheet: Figure 4-figure supplement 2D
Figure 4-figure supplement 2D
		% of mCherry /GluR 2/3+ cells
	% of GluR 2/3 / mCherry+ cells	Total	Dorsal
	96.1905	41.5638	66.0131
	94.958	54.5894	70.1863
	96.5035	54.3307	62.7273
	90.6977	46.2451	58.5
	98.6301	66.2577	81.203
	94.9045	63.1356	75.6345

## Sheet: Figure 4-figure supplement 2F
Figure 4-figure supplement 2F		c-fos+ cells / mm2 in Hilus
	Contralateral	AAV injected side		Unpaired t test
	81.43	226.2		P value	<0.0001
	94.29	218.6		P value summary	****
	81.76	213.9		Significantly different (P < 0.05)?	Yes
				One- or two-tailed P value?	Two-tailed

## Sheet: Figure 4-figure supplement 2G
Figure 4-figure supplement 2G
	% of c-fos+ / mCherry+ cells
	70.2703
	66.4062
	72.1854
	75.8065

## Sheet: Figure 4-figure supplement 2J
Figure 4-figure supplement 2J		BrdU+ DCX+ cells in SGZ (x103)
	AAV::mCherry	AAV::hM3Dq-mCherry		Unpaired t test
	2.01	4.995		P value	0.0015
	2.715	3.12		P value summary	**
	3.375	4.05		Significantly different (P < 0.05)?	Yes
	3.195	3.645		One- or two-tailed P value?	Two-tailed
	3	4.59
	3.09	4.02
	3.135	4.65
