# Supplementary material for: Shh from mossy cells contributes to preventing NSC pool depletion after seizure-induced neurogenesis and in aging
Source: eLife. 2023 Dec 11;12:RP91263. doi: 10.7554/eLife.91263 (PMC10712957; doi:10.7554/eLife.91263)
Supplement: Figure 4—figure supplement 3—source data 1. [file elife-91263-fig4-figsupp3-data1.xlsx]

## Sheet: Figure 4-figure supplement 3D
Figure 4-figure supplement 3D			% of mCherry+ / GluR2/3+ cells
	Total	Dorsal
	37.1025	57.0652
	29.572	41.989
	19.8582	37.8378
	37.0546	48.2972
	30.0366	39.2345

## Sheet: Figure 4-figure supplement 3G
Figure 4-figure supplement 3G		BrdU+ DCX+ cells in SGZ (x103)
															Two-way ANOVA	Ordinary
		AAV::mCherry						AAV::Cre-tdTomato							Alpha	0.05
	Naive	1.83	2.28	2.25	2.715	1.95	1.95	2.595	2.55	1.575	1.965	2.145
	KA	8.04	8.58	12.65				6.165	7.785	5.49	8.04	5.985			Source of Variation	P value	P value summary	Significant?
															Interaction	0.012	*	Yes
															Row Factor	<0.0001	****	Yes
															Column Factor	0.0121	*	Yes
															Tukey's multiple comparisons test	Summary	Adjusted P Value
															Naive:AAV::mCherry vs. Naive:AAV::Cre-tdTomato	ns	>0.9999
															Naive:AAV::mCherry vs. KA:AAV::mCherry	****	<0.0001
															Naive:AAV::mCherry vs. KA:AAV::Cre-tdTomato	****	<0.0001
															Naive:AAV::Cre-tdTomato vs. KA:AAV::mCherry	****	<0.0001
															Naive:AAV::Cre-tdTomato vs. KA:AAV::Cre-tdTomato	****	<0.0001
															KA:AAV::mCherry vs. KA:AAV::Cre-tdTomato	*	0.0101
