# Supplementary material for: Shh from mossy cells contributes to preventing NSC pool depletion after seizure-induced neurogenesis and in aging
Source: eLife. 2023 Dec 11;12:RP91263. doi: 10.7554/eLife.91263 (PMC10712957; doi:10.7554/eLife.91263)
Supplement: Figure 4—source data 1. [file elife-91263-fig4-data1.xlsx]

## Sheet: Figure 4D
Figure 4D
	% of GluR 2/3 / mCherry+ cells	% of mCherry /GluR 2/3+ cells
	98.0392	62.2407
	98.2456	69.1358
	99.4792	64.966

## Sheet: Figure 4F
Figure 4F	c-fos+ cells / mm2 in Hilus
	RC::L-hM3Dq	Crlr-Cre;hM3Dq		Unpaired t test
	70.0763	141.75		P value	0.0271
	78.0982	200.48		P value summary	*
	46.7226	118.89		Significantly different (P < 0.05)?	Yes
				One- or two-tailed P value?	Two-tailed

## Sheet: Figure 4G
Figure 4G	% of c-fos+ / mCherry+ cells
	% of c-fos
	76.5152
	74.2537
	64.3137

## Sheet: Figure 4J
Figure 4J	BrdU+ DCX+ cells in SGZ (x103)
	RC::L-hM3Dq	Crlr-Cre;hM3Dq		Unpaired t test
	7.2	13.26		P value	0.0093
	4.83	9.03		P value summary	**
	5.43	11.22		Significantly different (P < 0.05)?	Yes
	6.66	7.98		One- or two-tailed P value?	Two-tailed
		9.33

## Sheet: Figure 4M
Figure 4M	LacZ+ cells in SGZ (x103)
	RC::L-hM3Dq;Gli1nLacZ/+	Crlr-Cre;hM3Dq;Gli1nLacZ/+		Unpaired t test
	8.4	9.57		P value	0.0382
	9.39	10.35		P value summary	*
	6.75	9		Significantly different (P < 0.05)?	Yes
	5.79	10.62		One- or two-tailed P value?	Two-tailed
	8.25	13.44
	8.46
	7.86
	7.68
	12.18

## Sheet: Figure 4O
Figure 4O	BrdU+ DCX+ cells in SGZ (x103)
	Shh fl/fl;RC::L-hM3Dq	Crlr-Cre Shh fl/fl;hM3Dq		Unpaired t test
	5.7	6.9		P value	0.2372
	5.28	4.38		P value summary	ns
	6.63	3.57		Significantly different (P < 0.05)?	No
		5.22		One- or two-tailed P value?	Two-tailed
		2.94
