# Supplementary material for: Shh from mossy cells contributes to preventing NSC pool depletion after seizure-induced neurogenesis and in aging
Source: eLife. 2023 Dec 11;12:RP91263. doi: 10.7554/eLife.91263 (PMC10712957; doi:10.7554/eLife.91263)
Supplement: Figure 5—source data 1. [file elife-91263-fig5-data1.xlsx]

## Sheet: Figure 5D
Figure 5D	BrdU+ Sox2+ cells in SGZ at day 0 (x103)
		Control						Shh-cKO							Two-way ANOVA	Ordinary
	Naive	5.22	4.74	8.49	5.97	4.83	5.37	2.73	5.19	5.82	4.68				Alpha	0.05
	KA	21.06	20.94	24.15				18.57	14.37	16.26
															Source of Variation	P value	P value summary	Significant?
															Interaction	0.0195	*	Yes
															Row Factor	<0.0001	****	Yes
															Column Factor	0.0015	**	Yes
															Tukey's multiple comparisons test	Summary	Adjusted P Value
															Naive:Control vs. Naive:Shh-cKO	ns	0.6795
															Naive:Control vs. KA:Control	****	<0.0001
															Naive:Control vs. KA:Shh-cKO	****	<0.0001
															Naive:Shh-cKO vs. KA:Control	****	<0.0001
															Naive:Shh-cKO vs. KA:Shh-cKO	****	<0.0001
															KA:Control vs. KA:Shh-cKO	**	0.0047

## Sheet: Figure 5E
Figure 5E	BrdU+ Sox2+ GFAP+ radial NSCs in SGZ at 4 weeks (x103)
																	Two-way ANOVA	Ordinary
		Control							Shh-cKO								Alpha	0.05
	Naive	0.27	0.24	0.21	0.33	0.12	0.21	0.21	0.12	0.18	0.18	0.15
	KA	0.87	1.41	0.9	0.93	0.78	0.81		0.3	0.12	0.33	0.42					Source of Variation	P value	P value summary	Significant?
																	Interaction	0.0003	***	Yes
																	Row Factor	<0.0001	****	Yes
																	Column Factor	<0.0001	****	Yes
																	Tukey's multiple comparisons test	Summary	Adjusted P Value
																	Naive:Control vs. Naive:Shh-cKO	ns	0.8621
																	Naive:Control vs. KA:Control	****	<0.0001
																	Naive:Control vs. KA:Shh-cKO	ns	0.8826
																	Naive:Shh-cKO vs. KA:Control	****	<0.0001
																	Naive:Shh-cKO vs. KA:Shh-cKO	ns	0.5506
																	KA:Control vs. KA:Shh-cKO	****	<0.0001

## Sheet: Figure 5F
Figure 5F	% of BrdU+ NSCs at 4 weeks / BrdU+ NSCs at day 0
		Control							Shh-cKO								Two-way ANOVA	Ordinary
	Naive	4.67938	4.15945	3.63951	5.71924	2.07972	3.63951	3.63951	2.60586	3.90879	3.90879	3.25733					Alpha	0.05
	KA	3.94558	6.39456	4.08163	4.21769	3.53741	3.67347		1.82927	0.731707	2.0122	2.56098
																	Source of Variation	P value	P value summary	Significant?
																	Interaction	0.0342	*	Yes
																	Row Factor	0.1651	ns	No
																	Column Factor	0.0028	**	Yes
																	Tukey's multiple comparisons test	Summary	Adjusted P Value
																	Naive:Control vs. Naive:Shh-cKO	ns	0.8298
																	Naive:Control vs. KA:Control	ns	0.8997
																	Naive:Control vs. KA:Shh-cKO	*	0.0121
																	Naive:Shh-cKO vs. KA:Control	ns	0.5046
																	Naive:Shh-cKO vs. KA:Shh-cKO	ns	0.1173
																	KA:Control vs. KA:Shh-cKO	**	0.0043

## Sheet: Figure 5H
Figure 5H	Sox2+ GFAP+ radial NSCs (x103)
		Control							Shh-cKO								Two-way ANOVA	Ordinary
	Naive	15.03	13.32	17.01	17.43	16.47	15.54	15.36	13.2	17.85	16.74	10.68					Alpha	0.05
	KA	13.29	15.9	14.49	17.52	11.55	14.73		5.91	10.77	8.79	8.1
																	Source of Variation	P value	P value summary	Significant?
																	Interaction	0.012	*	Yes
																	Row Factor	<0.0001	****	Yes
																	Column Factor	0.0121	*	Yes
																	Tukey's multiple comparisons test	Summary	Adjusted P Value
																	Naive:AAV::mCherry vs. Naive:AAV::Cre-tdTomato	ns	>0.9999
																	Naive:AAV::mCherry vs. KA:AAV::mCherry	****	<0.0001
																	Naive:AAV::mCherry vs. KA:AAV::Cre-tdTomato	****	<0.0001
																	Naive:AAV::Cre-tdTomato vs. KA:AAV::mCherry	****	<0.0001
																	Naive:AAV::Cre-tdTomato vs. KA:AAV::Cre-tdTomato	****	<0.0001
																	KA:AAV::mCherry vs. KA:AAV::Cre-tdTomato	*	0.0101
