# Supplementary material for: Shh from mossy cells contributes to preventing NSC pool depletion after seizure-induced neurogenesis and in aging
Source: eLife. 2023 Dec 11;12:RP91263. doi: 10.7554/eLife.91263 (PMC10712957; doi:10.7554/eLife.91263)
Supplement: Figure 6—figure supplement 1—source data 1. [file elife-91263-fig6-figsupp1-data1.xlsx]

## Sheet: Supplementary file 1C
Supplementary file 1C	BrdU+ DCX+ cells in SGZ (x103)
	Control	Crlr-Cre Shhfl/fl	Shh fl/fl:RC::L-hM3Dq	Crlr-Cre Shhfl/fl;RC::L-hM3Dq		ANOVA summary
	4.32	3.54	3.36	3.69		F	0.402
	3.81	4.2	5.16	5.88		P value	0.754
	4.59	3.84	5.13	5.43		P value summary	ns
	6.63	4.83	5.61	2.82		Significant diff. among means (P < 0.05)?	No
	4.53
						Tukey's multiple comparisons test	Summary	Adjusted P Value
						Control vs. Crlr-Cre Shhfl/fl	ns	0.7839
						Control vs. Shh fl/fl:RC::L-hM3Dq	ns	>0.9999
						Control vs. Crlr-Cre Shhfl/fl;RC::L-hM3Dq	ns	0.9688
						Crlr-Cre Shhfl/fl vs. Shh fl/fl:RC::L-hM3Dq	ns	0.7821
						Crlr-Cre Shhfl/fl vs. Crlr-Cre Shhfl/fl;RC::L-hM3Dq	ns	0.965
						Shh fl/fl:RC::L-hM3Dq vs. Crlr-Cre Shhfl/fl;RC::L-hM3Dq	ns	0.9628

## Sheet: Supplementary file 1E
Supplementary file 1E	Sox2+ GFAP+ radial NSCs (x103)
	Control	Crlr-Cre Shhfl/fl	Shh fl/fl:RC::L-hM3Dq	Crlr-Cre Shhfl/fl;RC::L-hM3Dq		ANOVA summary
	21.63	20.16	17.67	20.16		F	1.304
	20.25	20.64	19.08	19.41		P value	0.3123
	21.96	22.86	19.38	20.7		P value summary	ns
	21.75	19.77	21.48	13.98		Significant diff. among means (P < 0.05)?	No
	17.7	20.73
						Tukey's multiple comparisons test	Summary	Adjusted P Value
						Control vs. Crlr-Cre Shhfl/fl	ns	0.999
						Control vs. Shh fl/fl:RC::L-hM3Dq	ns	0.7809
						Control vs. Crlr-Cre Shhfl/fl;RC::L-hM3Dq	ns	0.4204
						Crlr-Cre Shhfl/fl vs. Shh fl/fl:RC::L-hM3Dq	ns	0.7082
						Crlr-Cre Shhfl/fl vs. Crlr-Cre Shhfl/fl;RC::L-hM3Dq	ns	0.3547
						Shh fl/fl:RC::L-hM3Dq vs. Crlr-Cre Shhfl/fl;RC::L-hM3Dq	ns	0.9301

## Sheet: Supplementary file 1G
Supplementary file 1G	Sox2+ GFAP+ radial NSCs (x103)
	Control	Crlr-Cre Shhfl/fl	Shh fl/fl:RC::L-hM3Dq	Crlr-Cre Shhfl/fl;RC::L-hM3Dq		ANOVA summary
	10.95	6.72	9.9	7.89		F	11.89
	10.2	6.93	10.5	6.15		P value	0.0004
	8.4	5.1	11.73	7.47		P value summary	***
	7.53		12.3	7.38		Significant diff. among means (P < 0.05)?	Yes
			12.15	7.02
			8.4			Tukey's multiple comparisons test	Summary	Adjusted P Value
						Control vs. Crlr-Cre Shhfl/fl	*	0.035
						Control vs. Shh fl/fl:RC::L-hM3Dq	ns	0.2741
						Control vs. Crlr-Cre Shhfl/fl;RC::L-hM3Dq	ns	0.1147
						Crlr-Cre Shhfl/fl vs. Shh fl/fl:RC::L-hM3Dq	***	0.0009
						Crlr-Cre Shhfl/fl vs. Crlr-Cre Shhfl/fl;RC::L-hM3Dq	ns	0.7517
						Shh fl/fl:RC::L-hM3Dq vs. Crlr-Cre Shhfl/fl;RC::L-hM3Dq	**	0.0016
