# Supplementary material for: Shh from mossy cells contributes to preventing NSC pool depletion after seizure-induced neurogenesis and in aging
Source: eLife. 2023 Dec 11;12:RP91263. doi: 10.7554/eLife.91263 (PMC10712957; doi:10.7554/eLife.91263)
Supplement: Figure 6—source data 1. [file elife-91263-fig6-data1.xlsx]

## Sheet: Figure 6B
Figure 6B	Sox2+ GFAP+ radial NSCs (x103)
	Control	Shh-cKO		Unpaired t test
	10.95	6.72		P value	0.0349
	10.2	6.93		P value summary	*
	8.4	5.1		Significantly different (P < 0.05)?	Yes
	7.53			One- or two-tailed P value?	Two-tailed

## Sheet: Figure 6E
Figure 6E	% of BrdU+ NSCs at 4 weeks / BrdU+ NSCs at day 0
	10 Days
	Control	Shh-cKO		Unpaired t test
	14.4231	6.34921		P value	0.0032
	17.3077	6.34921		P value summary	**
	20.1923	9.52381		Significantly different (P < 0.05)?	Yes
		3.1746		One- or two-tailed P value?	Two-tailed
	4 weeks
	Control	Shh-cKO		Unpaired t test
	5.76923	0		P value	0.0284
	8.65385	3.1746		P value summary	*
	5.76923	3.1746		Significantly different (P < 0.05)?	Yes
	8.65385	6.34921		One- or two-tailed P value?	Two-tailed
	8.65385	6.34921
